# Supplementary material
Source: publisher figshare collection journal article supplement (https://sage.figshare.com/ndownloader/files/13347146)
Supplement: Supplementary file 1 [file 13347146]

## **Appendix A: Interview Guide**

### **A. Demographic information of the drivers**

1. How old are you?
2. What is your religion?
3. What is your marital status?
4. What is your highest educational qualification?
5. Do you have another occupation other than driving? If yes, what is the occupation?

### **B. *Information needs of the drivers***

6. Do you need information to improve your driving activities?
7. What types of information do you need?
8. How often do you need the information?
9. Are there times when you need specific information apart from those related to your profession??
10. What are the specific information needs and in what areas do you think they are mostly applicable?

### **B. *Information sources and seeking behaviour of the drivers***

11. What are the strategies you employ to seek for information?

12. What are the sources of information you consult to obtain information needed?
13. Do these information sources provide you with adequate information?
14. If not, what other strategy do you employ to meet the information need?
15. What factor(s) determined the choice of information sources you consult?
16. Are these sources of information relevant to your needs?

**C. *Information sharing behaviour of the drivers***

15. Do you believe in sharing information with your colleagues?
16. What type of information do you always share?
17. How often do you share information?

**D. *Challenges of information seeking and information sharing***

18. Do you encounter any problem or challenge when you seek for information?
19. Do you encounter any problem or challenge when you share information with your colleagues?
20. Do you seek for anything in exchange for the information you share?
